# Supplementary material
Source: publisher site journal article supplement (https://www.degruyterbrill.com/publication/isbn/9783110214932/downloadAsset/9783110214932_Inhaltsverzeichnis.pdf)
Supplement: Supplementary file 1 [file 9783110214932_Inhaltsverzeichnis.pdf]

# Inhalt

|                                                                                                                                                                                                  |     |
|--------------------------------------------------------------------------------------------------------------------------------------------------------------------------------------------------|-----|
| Einleitung .....                                                                                                                                                                                 | 1   |
| ALBERT SCHIRRMEISTER / STEFAN SCHLELEIN                                                                                                                                                          |     |
| Semantik im Vergleich. Politische Sprache in humanistischen National-<br>geschichten und Landesbeschreibungen .....                                                                              | 9   |
| THOMAS MAISSEN                                                                                                                                                                                   |     |
| Worin gründete der Erfolg der humanistischen Historiographie? Überlegungen<br>zur Rolle der Geschichtsschreibung im »Wettkampf der Nationen« .....                                               | 49  |
| UTA GOERLITZ                                                                                                                                                                                     |     |
| »...sine aliquo verborum splendore...«. Zur Genese frühneuzeitlicher<br>Mittelalter-Rezeption im Kontext humanistischer Antike-Transformation:<br>Konrad Peutinger und Kaiser Maximilian I. .... | 85  |
| CHRISTINA DEUTSCH                                                                                                                                                                                |     |
| »Dasselb buech han ich alles selb geschriben«. Die Ordnung der Geschichte(n)<br>in der Augsburger Chronik (1368–1468) des Burk(h)ard Zink .....                                                  | 111 |
| ANDREJ DORONIN                                                                                                                                                                                   |     |
| »baierisch nam, das römisch reich, die ganz christenhait«:<br>das Regionale, das Nationale und das Universale bei Aventin .....                                                                  | 123 |
| ELISABETH STEIN                                                                                                                                                                                  |     |
| Humanistische Schlachtenszenen? Zur Transzendierung antiker Modelle<br>in der Zeitgeschichtsschreibung des Paolo Giovio .....                                                                    | 151 |
| IGOR MELANI                                                                                                                                                                                      |     |
| The Historian Francesco Guicciardini between Political Action and<br>Historical Events .....                                                                                                     | 169 |
| PATRICK BAKER                                                                                                                                                                                    |     |
| A Labyrinth of Praise and Blame: On the Form and Structure of Marcantonio<br>Sabellico's <i>De latinae linguae reparatione</i> .....                                                             | 209 |

GIULIO BUSI

Giovanni Pico della Mirandola und die Entdeckung der jüdischen Mystik im  
italienischen Quattrocento ..... 241

AXELLE CHASSAGNETTE

Gedruckte Karten Kursachsens in der zweiten Hälfte des 16. Jahrhunderts:  
die Darstellung der Geschichte und des Territoriums im Spiegel der  
gelehrten Kartographie ..... 251

HARALD BOLLBUCK

Die Erfahrung der Peripherie: Antikenreferenz und empirisches Wissen  
in der norddeutschen Geschichtsschreibung des 16. Jahrhunderts ..... 275

CARMEN GONZÁLEZ VÁZQUEZ

Stories at the Royal Court, or *mirabilia* in Alessandro Geraldini's  
Humanistic Conception of History ..... 301

HARALD MÜLLER

Geschichtsschreibung am Hof und römische Antike im 16. Jahrhundert.  
Zusammenfassende Bemerkungen ..... 321

Register ..... 331

    Personenregister ..... 331

    Geographisches Register ..... 344

Autorenverzeichnis ..... 351
